# Supplementary material for: Tunable electrical properties of multilayer HfSe2field effect transistors by oxygen plasma treatment
Source: Royal Society of Chemistry journal article supplement (doi:10.1039/c6nr08467b), 2016-12-24
Supplement: c6nr08467b1.pdf [file c6nr08467b1.pdf]

## Supplementary Information

# Tunable electrical properties of multilayer HfSe<sub>2</sub> field effect transistors by oxygen plasma treatment

Moonshik Kang,<sup>a,b</sup> Servin Rathi,<sup>a</sup> Inyeal Lee,<sup>a</sup> Lijun Li,<sup>a</sup> Muhammad Atif Khan,<sup>a</sup> Dongsuk Lim,<sup>a</sup> Yoontae Lee,<sup>a</sup> Jinwoo Park,<sup>a</sup> Sun Jin Yun,<sup>c</sup> Doo-Hyeon Youn,<sup>c</sup> Chungsam Jun<sup>b</sup> and Gil-Ho Kim<sup>\*a</sup>

<sup>a</sup>College of Information and Communication Engineering and Sungkyunkwan Advanced Institute of Nanotechnology (SAINT), Sungkyunkwan University, Suwon 16419, Republic of Korea

<sup>b</sup>Manufacturing Engineering Team, Memory Division, Samsung Electronics Co., Hwasung 18448, Republic of Korea

<sup>c</sup>ICT Components and Materials Technology Research Division, Electronics and Telecommunications Research Institute, Daejeon 34129, Republic of Korea

\*Corresponding author E-mail: [ghkim@skku.edu](mailto:ghkim@skku.edu)

## 1. Degradation of electrical performance in HfSe<sub>2</sub> FETs without PR passivation

The requirement of photoresist (PR) passivation in the vicinity of the metal contacts in HfSe<sub>2</sub> FETs is illustrated in Fig. S1. If the devices are not treated for contact passivation, it results in the degradation of electrical performance (Fig. S1c and S1d) after O<sub>2</sub> plasma treatment. Besides the electrical degradation, the HfSe<sub>2</sub> layers were also damaged at the edge of the metal contacts, as seen from the optical images in Fig. S1a and S1b.

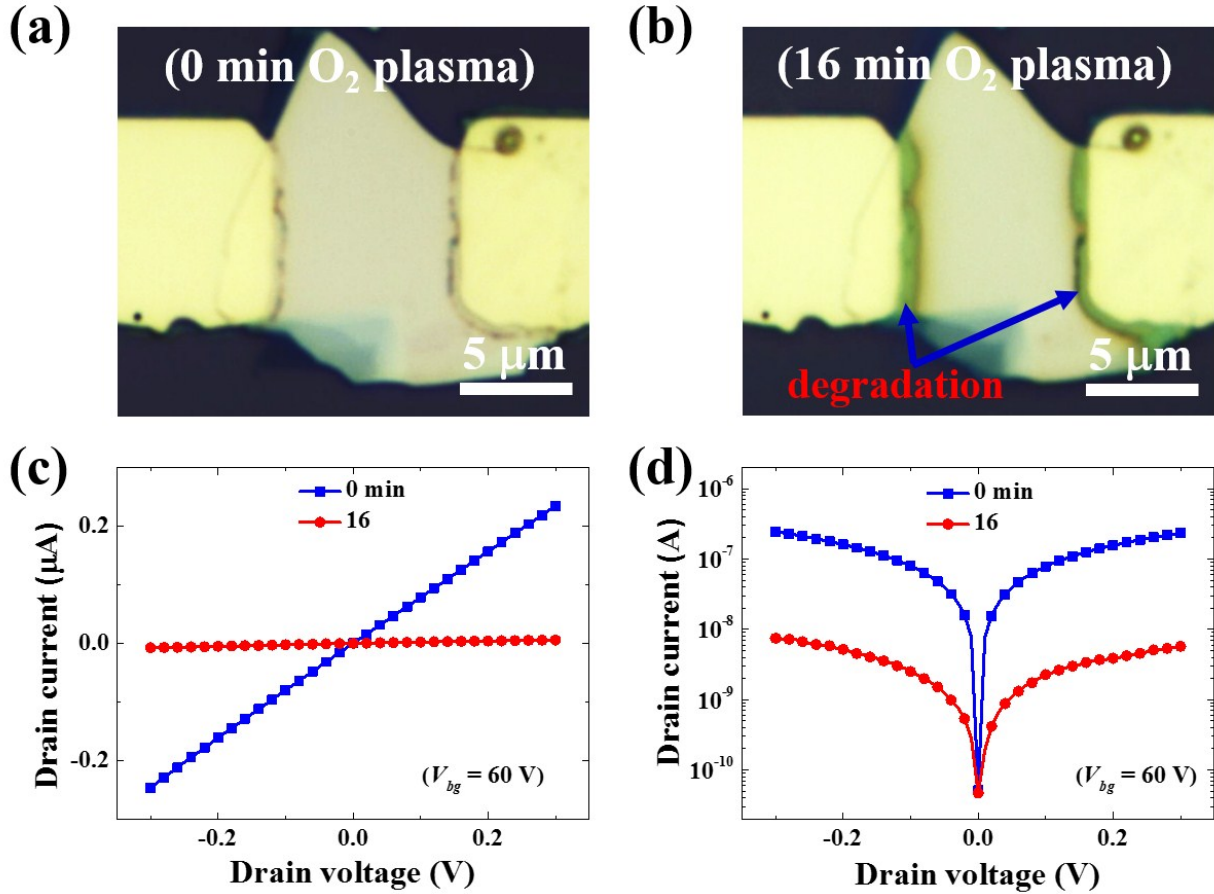

Fig. S1 Optical images of HfSe<sub>2</sub> FET (a) before and (b) after O<sub>2</sub> plasma treatment without the passivation of photoresist at the electrodes. The blue arrows indicate degradation at the metal electrodes. Output characteristics ( $I_{ds}$ - $V_{ds}$ ) of HfSe<sub>2</sub> FET before and after O<sub>2</sub> plasma treatment in (c) linear scale and (d) semi-logarithmic scale at room temperature, respectively.

The main reason behind the observed physical damage is joule heating at the non-ideal Ohmic contacts which enhances the oxidation of the layers at the contact regions. Therefore, the passivation of

the contact area by photoresist not only isolate them from oxidation in ambient conditions, but also protect the contact area from the O<sub>2</sub> plasma-induced oxidation.

## 2. Thickness-dependent Raman spectra of O<sub>2</sub> plasma-treated HfSe<sub>2</sub>

The thickness dependent Raman spectra show that the thinner flakes have higher characteristic intensity of A<sub>1g</sub> peak which decreases systematically with the flake thickness increase as shown in Fig. S2a. Whereas, after plasma treatment (50 W, 7 min), the HfO<sub>x</sub> intensity peak (at 255 cm<sup>-1</sup>) showed reverse trends, with the vanishing of A<sub>1g</sub> peak for 4.5 nm flake, indicating the full transformation of the HfSe<sub>2</sub> into HfO<sub>x</sub>. However, both A<sub>1g</sub> and oxide peaks appeared for thicker flakes indicating a partial oxidation of the top layers which shield the bottom HfSe<sub>2</sub> layers and the exact number of top oxidized HfSe<sub>2</sub> layers depends on the given plasma power and time.

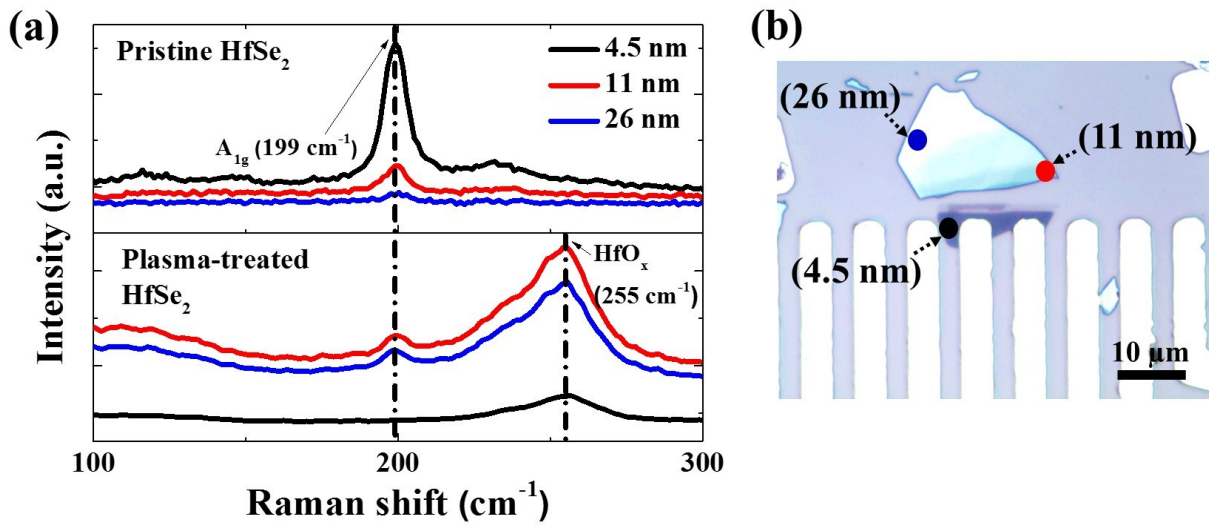

Fig. S2 (a) Raman spectra of 4.5, 11, and 26 nm thick HfSe<sub>2</sub> flakes represented by black, red, and blue color, respectively, for pristine and O<sub>2</sub> plasma-treated HfSe<sub>2</sub>. (b) Optical image of the HfSe<sub>2</sub> flakes before the plasma treatment

## 3. Average increase in the thickness of HfSe<sub>2</sub> flake after O<sub>2</sub> plasma treatment

Fig. S3a shows the electrical characteristics of HfSe<sub>2</sub> FET with different O<sub>2</sub> plasma exposure times. The on/off ratio ( $I_{on/off}$ ) increases by an order of magnitude from 10<sup>2</sup> to 3 × 10<sup>3</sup> and mobility ( $\mu_{FE}$ ) also

increases by 1.5 times of the initial value. Fig. S3b-d show that the plasma-treated HfSe<sub>2</sub> flake have higher roughness as compared to the photoresist covered layers. The increase in the thickness of plasma-treated HfSe<sub>2</sub> can be attributed to the expanded interlayer distance due to oxidation.

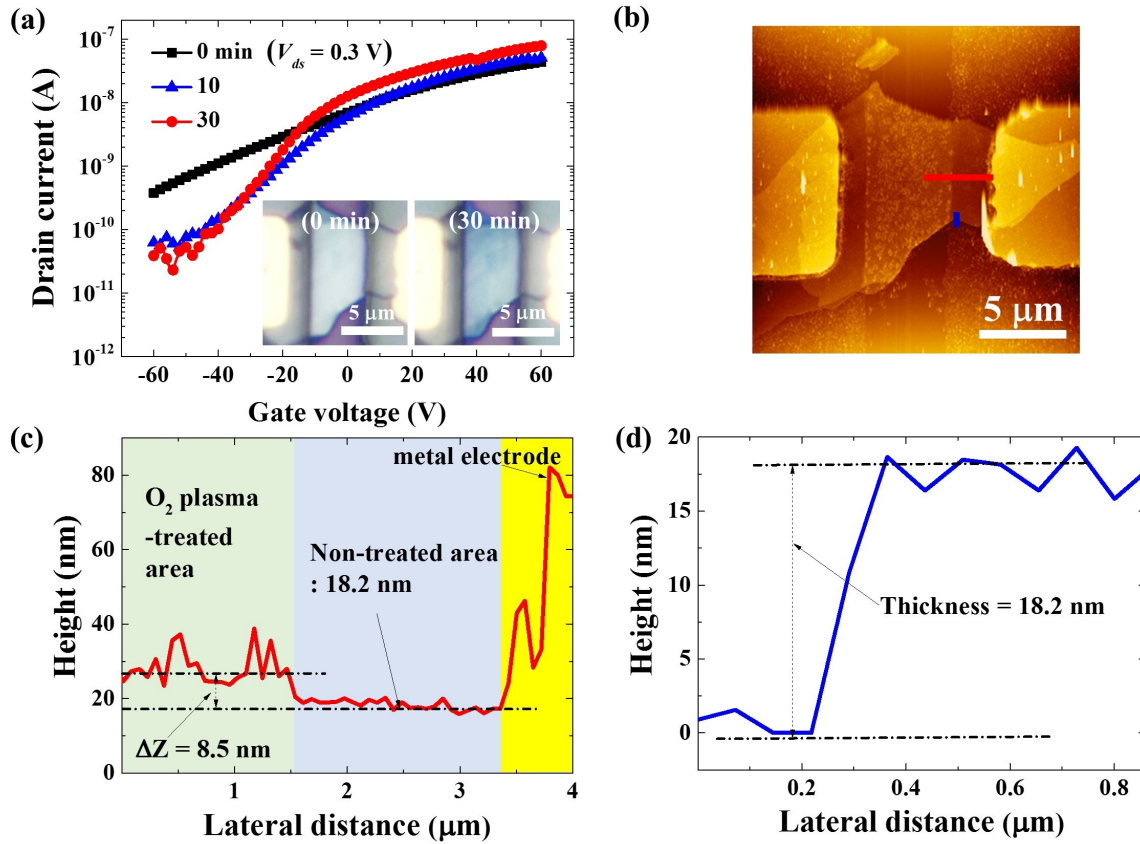

Fig. S3 (a) Transfer characteristics at  $V_{ds} = 0.3$  V for HfSe<sub>2</sub> FET with different O<sub>2</sub> plasma exposure time, in semi-log scale. The insets show optical images of HfSe<sub>2</sub> FET before and after O<sub>2</sub> plasma treatment for 30 min. (b) AFM image, (c) thickness line-profile of the plasma-treated HfSe<sub>2</sub> along the red line, and (d) thickness line-profile ( $\sim 18.2$  nm) along the blue line of the photoresist covered HfSe<sub>2</sub>. The average increase in the thickness of the O<sub>2</sub> plasma-treated HfSe<sub>2</sub> is approximately 8.5 nm.

#### 4. Resistor network model for multilayer HfSe<sub>2</sub> back-gated FETs before and after O<sub>2</sub> plasma treatment

As discussed in the main manuscript that the thicker channel FETs are highly inefficient to turn off the device due to the screening effect of the bottom layers as the gate field is insufficient to deplete the top layers, thus resulting in a high off-current and poor device characteristic. The  $O_2$  plasma treatment transform these top semiconducting layers to oxide layers which improves the device characteristics like on/off ratio ( $I_{on/off}$ ) and subthreshold slope. The total resistance for the multilayer  $HfSe_2$  devices is illustrated in Fig. S4a and S4b for pristine and  $O_2$  plasma-treated devices. As seen from the figures that the pristine devices have high off-current whereas the  $O_2$  plasma-treated devices are well controlled by the gate-field. Although, this lead to a slight drop in the on current of the device due to discontinuing of the parallel conduction in the top layers, but the on/off ratio ( $I_{on/off}$ ) increases by several order of magnitude, thus resulting in the improved device performances.<sup>S1,S2</sup>

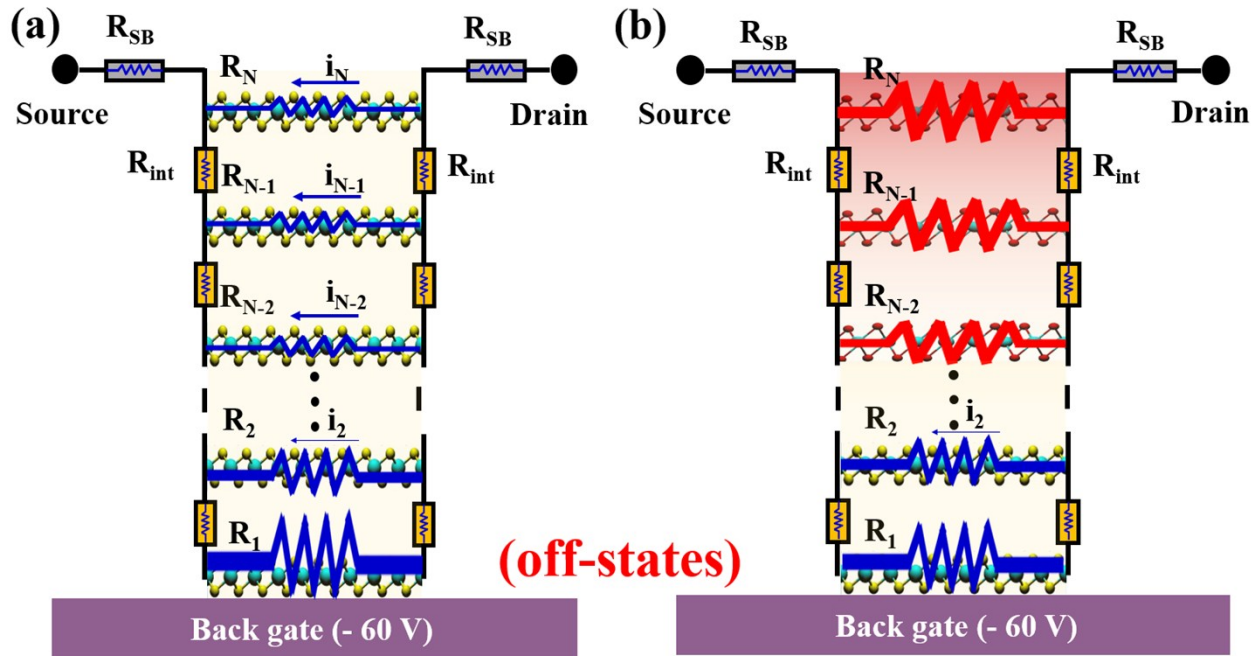

Fig. S4 Schematic diagrams for multi-layer  $HfSe_2$  FETs (a) before and (b) after  $O_2$  plasma treatment with resistor network models in the off-states.  $R_1$  to  $R_N$  and  $i_2$  to  $i_N$  are the intra-layer resistances and currents of each  $HfSe_2$  monolayer, respectively.  $R_{int}$  is the interlayer resistance between two consecutive  $HfSe_2$  layers, while  $R_{SB}$  is the contact resistance due to Schottky barrier height at the interface of metal and  $HfSe_2$ .

## 5. Transfer characteristics of O<sub>2</sub> plasma-treated HfSe<sub>2</sub> FETs with a thick channel at the various plasma power conditions

Fig. S5a-d show the effect of plasma treatment on very thick flakes ( $> 60$  nm). As can be seen from the figures that even high plasma power treatment results in no improvements in the off-current. The possible reason for this behavior is that even after plasma treatment, the underlying HfSe<sub>2</sub> layers are still thick enough to screen the gate-field at the layer beneath the top oxidized layers by the plasma treatment. Therefore, this plasma process is only compatible to improve the performance of devices whose channel thickness lies in the range of  $\sim 10$ -20 nm.

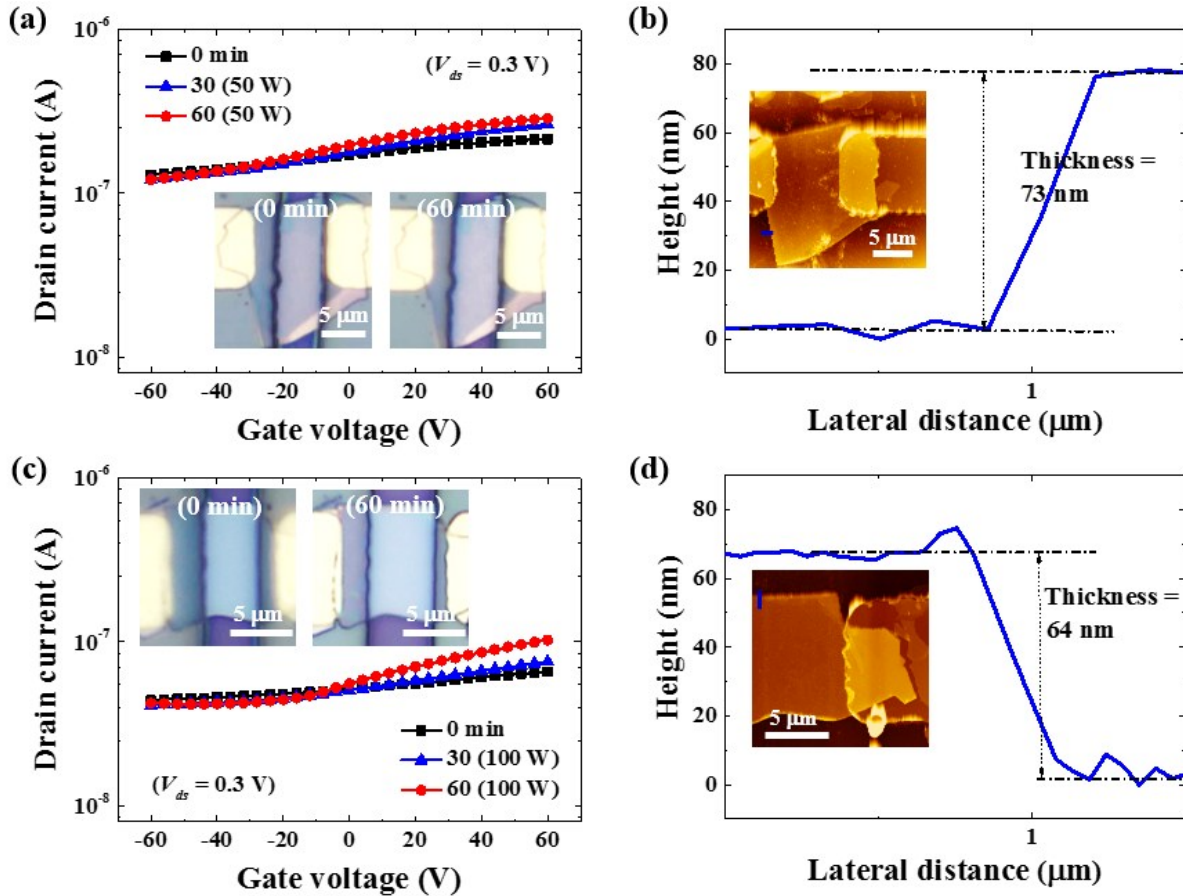

Fig. S5 (a) Transfer characteristics at  $V_{ds} = 0.3$  V for HfSe<sub>2</sub> FET with different O<sub>2</sub> plasma exposure times at a power of 50 W, in semi-log scale. The inset shows optical images of HfSe<sub>2</sub> FET before and after O<sub>2</sub> plasma treatment for 60 min. (b) Line-profile along the blue line indicates the flake thickness of



$\sim 73$  nm. The inset shows the corresponding AFM image of the HfSe<sub>2</sub> FET. (c) Transfer characteristics at  $V_{ds} = 0.3$  V for HfSe<sub>2</sub> FET with different O<sub>2</sub> plasma exposure times at a power of 100 W, in semi-log scale. The inset shows optical images of HfSe<sub>2</sub> FET before and after O<sub>2</sub> plasma treatment for 60 min. (d) Line-profile along the blue line indicates the flake thickness of  $\sim 64$  nm. The inset shows the corresponding AFM image of the HfSe<sub>2</sub> FET.

## 6. Energy band diagrams for the HfSe<sub>2</sub> FET before and after O<sub>2</sub> plasma treatment

The effect of plasma treatment on the HfSe<sub>2</sub> FET is illustrated in Fig. S6a and S6b, where the O<sub>2</sub> plasma-induced carrier depletion in the channel resulting in the formation of additional barriers at the interface of photoresist covered and the open channel HfSe<sub>2</sub> layers. Therefore, in the plasma-treated device, the injected carriers from the source have to overcome an additional barrier which results in a small decrease in the channel current and a positive shift in the threshold voltage.

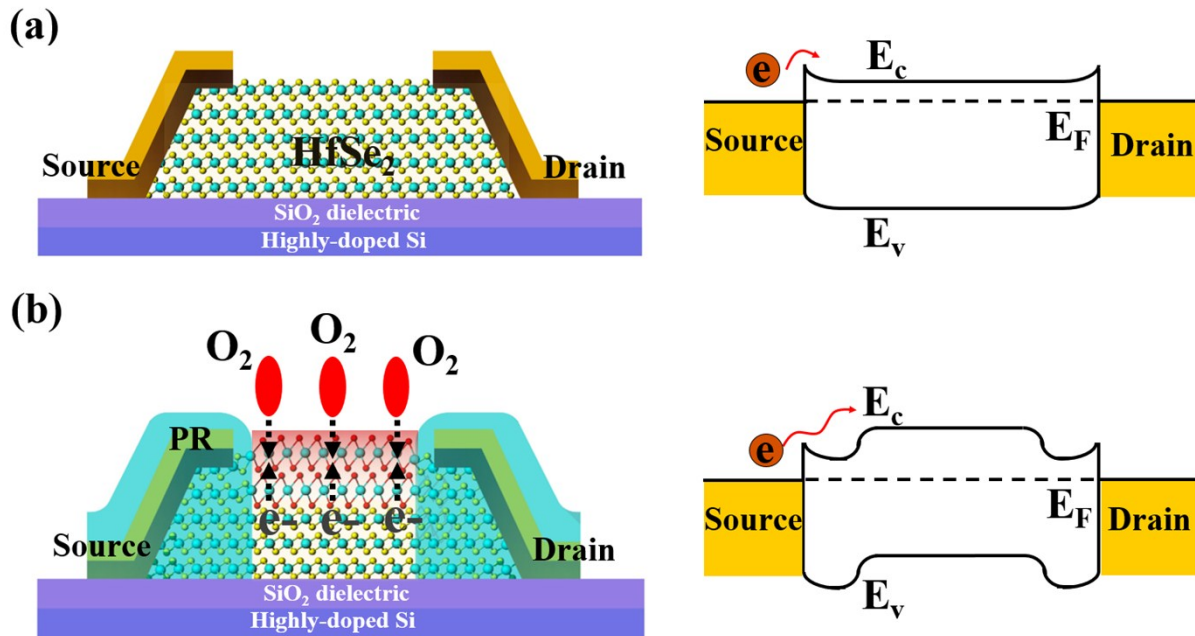

Fig. S6 Schematic energy band diagrams of HfSe<sub>2</sub> FET for the conditions of (a) before O<sub>2</sub> plasma treatment and (b) after O<sub>2</sub> plasma treatment.

## 7. Channel carrier density with O<sub>2</sub> plasma-treated time

The plasma treatment is usually followed by the depletion of electron concentration in the channel. Fig. S7 plots the HfSe<sub>2</sub> FETs channel carrier density with the plasma-treated time. It can be seen from the figure that after an initial drop, the carrier density stabilizes over a wide range from 5 to 20 min and rapidly decreases thereafter.

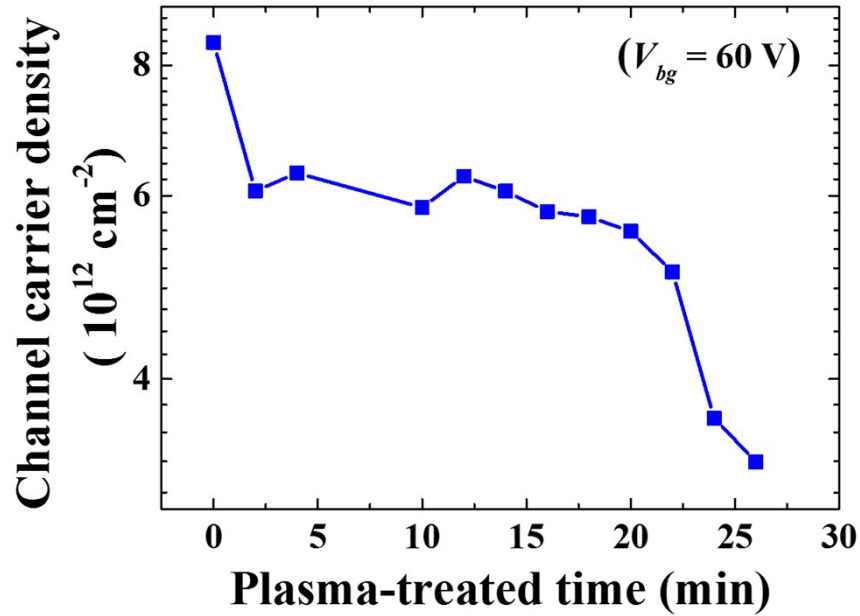

Fig. S7 Channel carrier density of the HfSe<sub>2</sub> FETs as a function of the O<sub>2</sub> plasma treatment times.

## 8. Stability test of the plasma treated and pristine HfSe<sub>2</sub> FETs

In order to confirm the effect of the plasma treated top layers on the stability of the devices, we carried out the stability test on both plasma treated and pristine devices. The results illustrate that the off current reduces in both the pristine and plasma devices but the on-current got stabilized in the plasma treated samples, Fig. S8. This can be explained from the passivation effect of the plasma induced oxidized layer, which reduces the rate of oxidation in the plasma treated devices whereas in the pristine device, the absence of top oxidized layers results in higher oxidation rate leading to the reduction in both on and off current of the pristine device. Although the off current decreases in the plasma treated device as well due to the intrinsic time-dependent degradation of the layers thus resulting in the observed decrement in the off current, as shown in the schematic, Fig. S4. However, such intrinsic time-dependent oxidation



would not affect the on current until the layers within the screening length are not affected by the oxidation process.

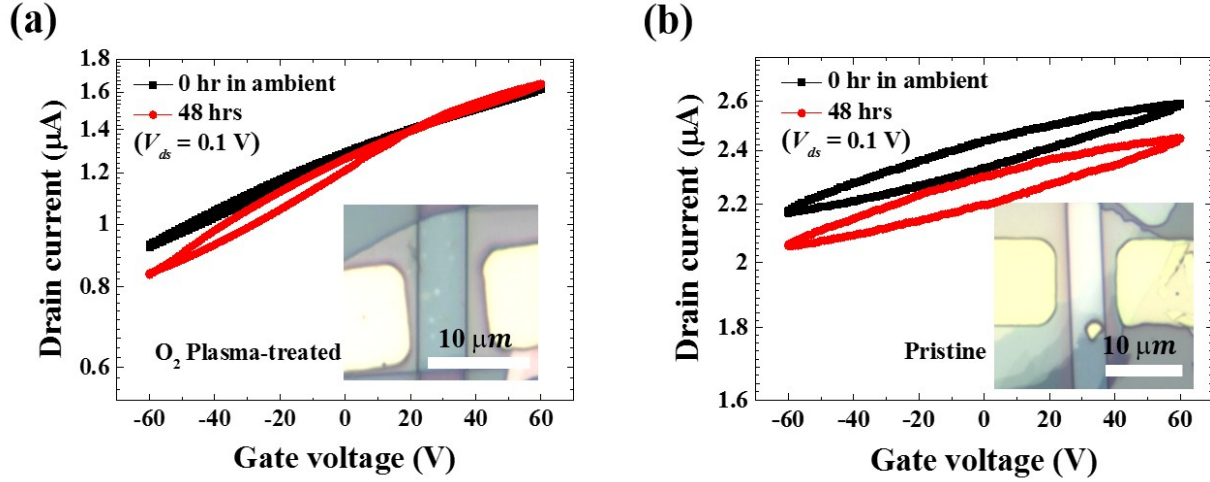

Fig. S8 Transfer measurement of (a) the plasma treated and (b) pristine device over the span of 48 hrs.

## 9. Photoresponse of pristine and plasma treated $\text{HfSe}_2$ photodetector

For a reliable comparison of photoresponse of pristine and plasma treated device and to rule out the flake thickness and ohmic contact variations, we first measure the photoresponse of the pristine device, followed by the plasma treatment of the same device for photoresponse measurement. From the measurement results, the plasma treated device shows better performance as compared to the pristine device, Fig. S9. Important metrics like  $I_{\text{laser}}/I_{\text{dark}}$ , photoresponse time improves with the plasma treatment. The improvement in electrical characteristics and additional defects created by plasma treatment can account for such enhancement as particularly for photoresponse, the creation of additional defects enhances the recombination rate of the photogenerated carriers, thereby improving the photoresponse time.<sup>S2</sup>

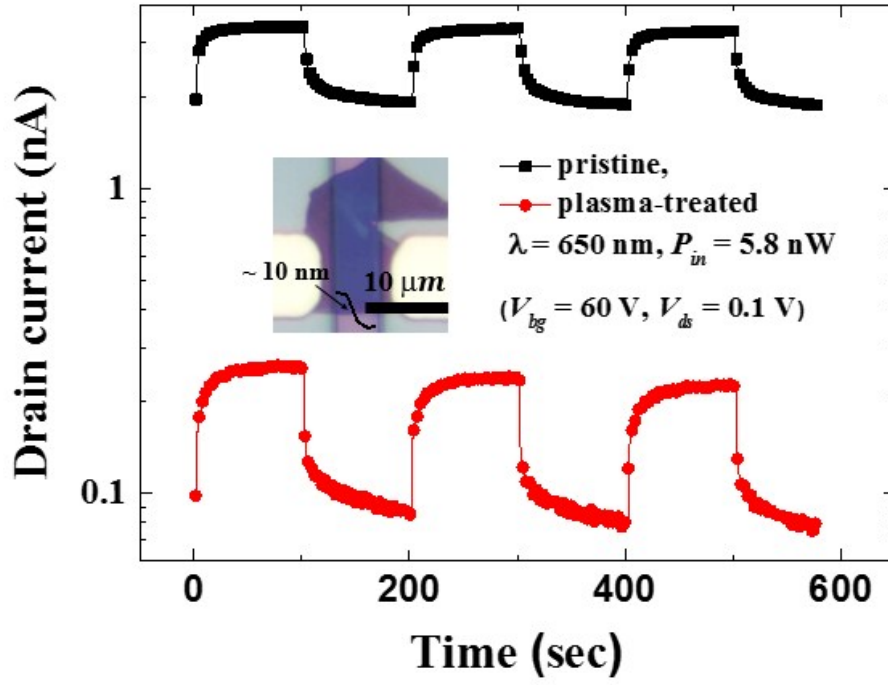

Fig. S9 Temporal photoresponse characteristics of pristine and plasma-treated HfSe<sub>2</sub> photodetector, where  $V_{bg} = 60$  V,  $V_{ds} = 0.1$  V. The HfSe<sub>2</sub> photodetector treated by O<sub>2</sub> plasma for 10 minute. It was illuminated by laser at wavelength of 650 nm, where the laser incident power was 5.8 nW. The thicknesses of the pristine flake was 10 nm , as measured by atomic force microscopy (AFM).

## 10. Photoresponsivity and specific detectivity of HfSe<sub>2</sub> photodetector at different wavelengths

Fig. S10 shows the calculated photoresponsivity ( $R$ ) and specific detectivity ( $D^*$ ) of HfSe<sub>2</sub> photodetectors at different wavelengths. Specific detectivity is a measure of detector sensitivity and, assuming that shot noise from dark current is the major contributor to the total noise, it is given by  $D^* = RS^{1/2} / (2qI_{dark})^{1/2}$ ,<sup>S3</sup> where  $R$  is the photoresponsivity,  $S$  is the active area of the photodetector,  $q$  is the unit of charge, and  $I_{dark}$  is dark current. Within the wavelength ranging from 520 to 780 nm, the photodetectors show good performance even at the low  $V_{ds} = 0.1$  V. For the visible regions ( $\lambda = 520 - 650$  nm),  $R$  and  $D^*$  exist in the range of 0.64 to 2.94 A W<sup>-1</sup> and 1.01 to 4.65 x 10<sup>10</sup> Jones, respectively. However,  $R$  and  $D^*$  of the near-infrared region ( $\lambda = 780$  nm) are significantly reduced to 48 mA W<sup>-1</sup> and 7.62 x 10<sup>8</sup> Jones, respectively.

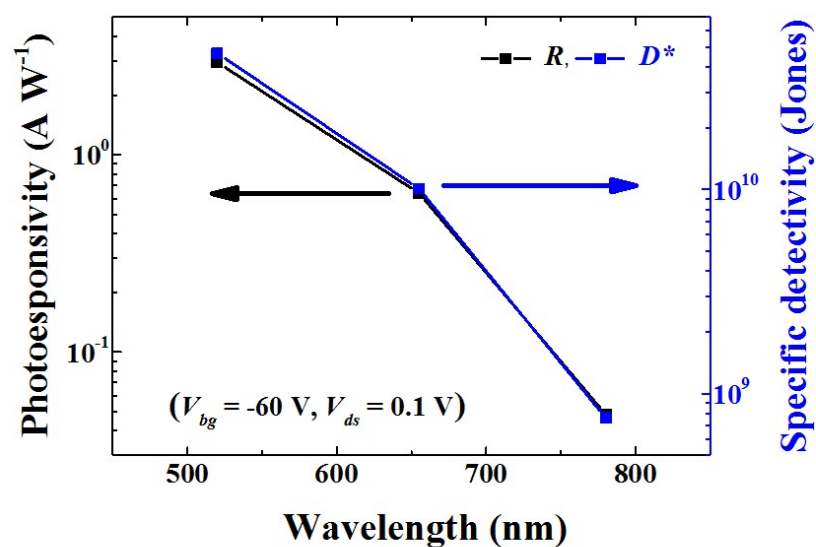

Fig. S10 Photoresponsivity ( $R$ ) and specific detectivity ( $D^*$ ) of HfSe<sub>2</sub> photodetectors at the different wavelengths.

## Supplementary references

- S1. Y. Sui and J. Appenzeller, *Nano Lett.*, 2009, **9**, 2973-2977.
- S2. J. Shim, A. Oh, D.-H. Kang, S. Oh, S. K. Jang, J. Jeon, M. H. Jeon, M. Kim, C. Choi, J. Lee, S. Lee, G. Y. Yeom, Y. J. Song, J.-H. Park, *Adv. Mater.*, 2016, **28**, 6985-6992.
- S3. M. S. Choi, D. Qu, D. Lee, X. Liu, K. Watanabe, T. Taniguchi, W. J. Yoo, *ACS Nano*, 2014, **9**, 9332-9340.
